# Supplementary material for: TGF‐β and Hypoxia/Reoxygenation Promote Radioresistance of A549 Lung Cancer Cells through Activation of Nrf2 and EGFR
Source: Hindawi journal article supplement (doi:10.1155/2016/6823471), 2016-01-01
Supplement: f1 [file 6823471.f1.pdf]

## Supplemental figure legend

**Fig. S1. Combined treatment with TGF- $\beta$  and hypoxia induced the Nrf2 expression and EGFR phosphorylation in A549 cells.** (A) A549 cells were treated with 1 ng/mL TGF- $\beta$  and incubated under hypoxia for 2 h, followed by reoxygenation for 1 or 6 h. Cells were prepared 8 h after cotreatment with TGF- $\beta$  and hypoxia/reoxygenation for western blot analysis. (B). A549 cells were treated with 1 ng/mL TGF- $\beta$  and incubated under hypoxia for the indicated time periods (1, 2, 4, 7, or 8 h), followed by reoxygenation (1, 4, 6, or 7 h), and cell lysates were analyzed by western blot. (C) Cells were treated for the indicated times as described in Fig. S1A to detect phospho-EGFR. (D) H1299 cells were treated with 1 ng/mL TGF- $\beta$  and incubated under hypoxia for 2 h, followed by reoxygenation for 6 h. Cells were prepared 8 h after the treatment for western blot analysis.

A

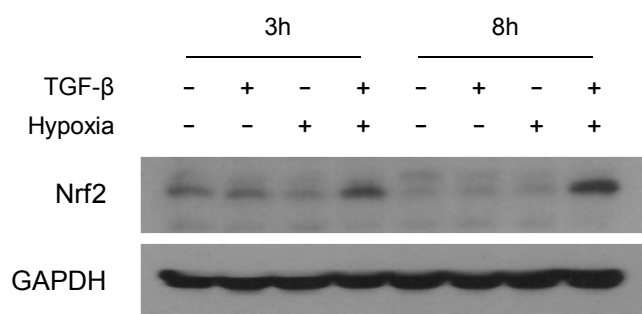

B

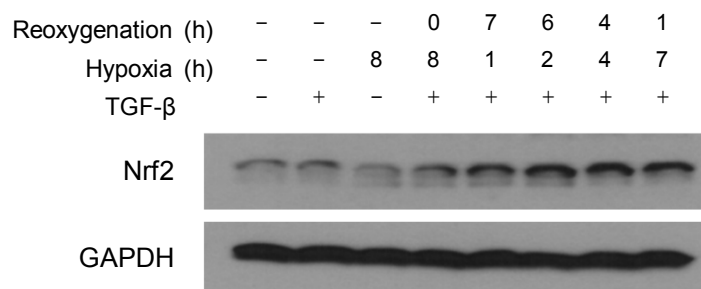

C

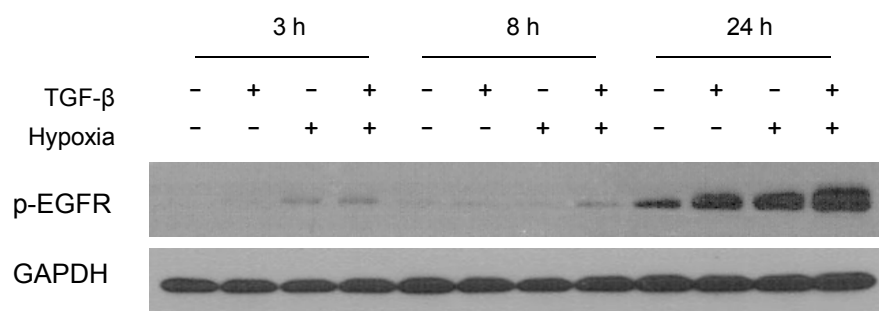

D

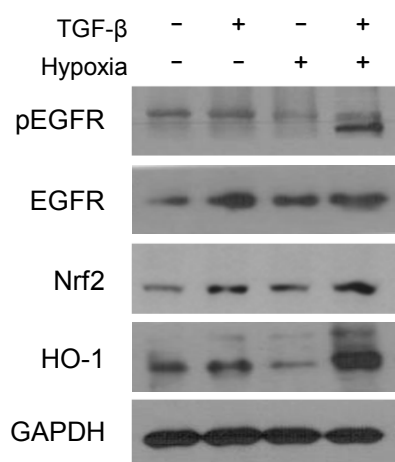

*Supplemental Figure 1*
